# Supplementary material for: What Are the Contextual Enablers and Impacts of Using Digital Technology to Extend Maternal and Child Health Services to Rural Areas? Findings of a Qualitative Study From Nigeria
Source: Frontiers journal article supplement (doi:10.3389/fgwh.2021.670494), 2021-05-14
Supplement: Data_Sheet_1.PDF [file Data_Sheet_1.PDF]

## Appendix 2: Participant consent form

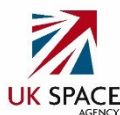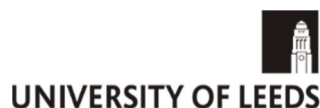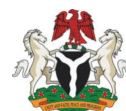

|                                                                                                                                                                                                                                                                                                                                                                                                                                                                                                                                                                                                                   |                                                                            |
|-------------------------------------------------------------------------------------------------------------------------------------------------------------------------------------------------------------------------------------------------------------------------------------------------------------------------------------------------------------------------------------------------------------------------------------------------------------------------------------------------------------------------------------------------------------------------------------------------------------------|----------------------------------------------------------------------------|
| <b>Consent to take part in the study of:</b><br><br><b>Extending Health Services to remote areas in Nigeria using Satellite Communication to strengthen health systems and improve health outcomes (EXTEND Project)</b>                                                                                                                                                                                                                                                                                                                                                                                           | Add your initials or thumb print next to the statements below if you agree |
| I confirm that I have read and understand the information sheet dated 1 <sup>st</sup> June 2017 explaining the above research project and I have had the opportunity to ask questions about the project.                                                                                                                                                                                                                                                                                                                                                                                                          |                                                                            |
| I understand that my participation is voluntary and that I am free to withdraw at any time before or during the interviews without giving any reason and without there being any negative consequences. In addition, should I not wish to answer any particular question or questions, I am free to decline.<br><br>Contact number of lead researcher is: +44 780 150 6584<br><br>I understand that any data/responses already provided will be deleted. I also understand that participants can withdraw their data up to 48 hrs after the individual interview, after which time data analysis will have begun. |                                                                            |
| I understand that the interviews may be audio-recorded. I give permission for members of the research team to make audio-recordings of the discussions.                                                                                                                                                                                                                                                                                                                                                                                                                                                           |                                                                            |
| I give permission for members of the research team to have access to my anonymised responses. I understand that my name will not be linked with the research materials, and I will not be identified or identifiable in the report or reports that result from the research.<br><br>I understand that my responses will be kept strictly confidential.                                                                                                                                                                                                                                                            |                                                                            |
| I agree for the data collected from me to be stored and used in relevant future research in an anonymised form. I understand that the results of the study will be published in academic journals. I agree that direct quotations from my responses can be published in anonymised form as part of illustrating findings and interpretation of the study.                                                                                                                                                                                                                                                         |                                                                            |
| I agree to take part in the above research project and will inform the lead researcher should my contact details change.                                                                                                                                                                                                                                                                                                                                                                                                                                                                                          |                                                                            |

|                                        |  |
|----------------------------------------|--|
| Name of participant                    |  |
| Participant's signature or thumb print |  |
| Date                                   |  |
| Name of person taking consent          |  |
| Signature                              |  |
| Date*                                  |  |

\*To be signed and dated in the presence of the participant.

Once this has been signed by all parties the participant should receive a copy of the signed and dated participant consent form, the letter/ pre-written script/ information sheet and any other written information provided to the participants. A copy of the signed and dated consent form should be kept with the project's main documents which must be kept in a secure location.
