# Supplementary material for: What Are the Contextual Enablers and Impacts of Using Digital Technology to Extend Maternal and Child Health Services to Rural Areas? Findings of a Qualitative Study From Nigeria
Source: Frontiers journal article supplement (doi:10.3389/fgwh.2021.670494), 2021-05-14
Supplement: Data_Sheet_3.PDF [file Data_Sheet_3.PDF]

**Manuscript: What are the contextual enablers and impacts of using digital technology to extend healthcare services to rural areas? Findings of a mixed-method evaluation from Nigeria.**

**Consolidated criteria for reporting qualitative studies (COREQ): 32-item checklist**

Developed from:

Tong A, Sainsbury P, Craig J. Consolidated criteria for reporting qualitative research (COREQ): a 32-item checklist for interviews and focus groups. *International Journal for Quality in Health Care*. 2007. Volume 19, Number 6: pp. 349 – 357

| No. Item                                       | Guide questions/description                                                                                                               | Reported on Page #                                                            |
|------------------------------------------------|-------------------------------------------------------------------------------------------------------------------------------------------|-------------------------------------------------------------------------------|
| <b>Domain 1: Research team and reflexivity</b> |                                                                                                                                           |                                                                               |
| <i>Personal Characteristics</i>                |                                                                                                                                           |                                                                               |
| 1. Inter viewer/facilitator                    | Which author/s conducted the interview or focus group?                                                                                    | Pages 7 and 8 (section 2.5 data collection and section 2.6 data analysis)     |
| 2. Credentials                                 | What were the researcher's credentials? E.g. PhD, MD                                                                                      | Page 7 (section 2.5 data collection)                                          |
| 3. Occupation                                  | What was their occupation at the time of the study?                                                                                       | Page 7 (section 2.5 data collection)                                          |
| 4. Gender                                      | Was the researcher male or female?                                                                                                        | Page 7 (section 2.5 data collection)                                          |
| 5. Experience and training                     | What experience or training did the researcher have?                                                                                      | Page 7 (section 2.5 data collection)                                          |
| <i>Relationship with participants</i>          |                                                                                                                                           |                                                                               |
| 6. Relationship established                    | Was a relationship established prior to study commencement?                                                                               | Yes, inferred from page 7                                                     |
| 7. Participant knowledge of the interviewer    | What did the participants know about the researcher? e.g. personal goals, reasons for doing the research                                  | Inferred from pages 7 and 8 (Data collection and analysis sections)           |
| 8. Interviewer characteristics                 | What characteristics were reported about the interviewer/facilitator? e.g. Bias, assumptions, reasons and interests in the research topic | Reason for conducting the research (see aim of study in page 3 of manuscript) |

|                                          |                                                                                                                                                          |                                                                                                                            |
|------------------------------------------|----------------------------------------------------------------------------------------------------------------------------------------------------------|----------------------------------------------------------------------------------------------------------------------------|
| <b>Domain 2: study design</b>            |                                                                                                                                                          |                                                                                                                            |
| <i>Theoretical framework</i>             |                                                                                                                                                          |                                                                                                                            |
| 9. Methodological orientation and Theory | What methodological orientation was stated to underpin the study? e.g. grounded theory, discourse analysis, ethnography, phenomenology, content analysis | Pages 5, 6 and 8 (section 2.2 conceptual frameworks, and sections 2.5 and 2.6 i.e. data collection and analysis).          |
| <i>Participant selection</i>             |                                                                                                                                                          |                                                                                                                            |
| 10. Sampling                             | How were participants selected? e.g. purposive, convenience, consecutive, snowball                                                                       | Page 7 (section 2.5 data collection)                                                                                       |
| 11. Method of approach                   | How were participants approached? e.g. face-to-face, telephone, mail, email                                                                              | Face-to-face: Page 7 (section 2.3 study participants)                                                                      |
| 12. Sample size                          | How many participants were in the study?                                                                                                                 | Page 7 (section 2.5 data collection)                                                                                       |
| 13. Non-participation                    | How many people refused to participate or dropped out? Reasons?                                                                                          | Page 7: not provided                                                                                                       |
| <i>Setting</i>                           |                                                                                                                                                          |                                                                                                                            |
| 14. Setting of data collection           | Where was the data collected? e.g. home, clinic, workplace                                                                                               | Page 8 (section 2.5 data collection)                                                                                       |
| 15. Presence of non-participants         | Was anyone else present besides the participants and researchers?                                                                                        | Not applicable                                                                                                             |
| 16. Description of sample                | What are the important characteristics of the sample? e.g. demographic data, date                                                                        | Page 9 (section 3.1 characteristics of stakeholders)                                                                       |
| <i>Data collection</i>                   |                                                                                                                                                          |                                                                                                                            |
| 17. Interview guide                      | Were questions, prompts, guides provided by the authors? Was it pilot tested?                                                                            | Additional file 2 and page 10                                                                                              |
| 18. Repeat interviews                    | Were repeat interviews carried out? If yes, how many?                                                                                                    | Yes. There were 4 phases of data collection (baseline, midline, end-line and legacy assessment) see Table 4 in section 3.1 |

|                                        |                                                                                                                                 |                                                            |
|----------------------------------------|---------------------------------------------------------------------------------------------------------------------------------|------------------------------------------------------------|
|                                        |                                                                                                                                 |                                                            |
| 19. Audio/visual recording             | Did the research use audio or visual recording to collect the data?                                                             | Page 8 (section 2.5 data collection)                       |
| 20. Field notes                        | Were field notes made during and/or after the interview or focus group?                                                         | Yes.                                                       |
| 21. Duration                           | What was the duration of the interviews or focus group?                                                                         | Page 8 (section 2.5 data collection)                       |
| 22. Data saturation                    | Was data saturation discussed?                                                                                                  | No, Not applicable                                         |
| 23. Transcripts returned               | Were transcripts returned to participants for comment and/or correction?                                                        | No, Not applicable.                                        |
| <b>Domain 3: analysis and findings</b> |                                                                                                                                 |                                                            |
| <i>Data analysis</i>                   |                                                                                                                                 |                                                            |
| 24. Number of data coders              | How many data coders coded the data?                                                                                            | Page 8 and 9 (section 2.6 data analysis)                   |
| 25. Description of the coding tree     | Did authors provide a description of the coding tree?                                                                           | Page 8 and 9 (section 2.6 data analysis)                   |
| 26. Derivation of themes               | Were themes identified in advance or derived from the data?                                                                     | Page 9 Mainly derived from the data                        |
| 27. Software                           | What software, if applicable, was used to manage the data?                                                                      | Page 8                                                     |
| 28. Participant checking               | Did participants provide feedback on the findings?                                                                              | No                                                         |
| <i>Reporting</i>                       |                                                                                                                                 |                                                            |
| 29. Quotations presented               | Were participant quotations presented to illustrate the themes/findings? Was each quotation identified? e.g. participant number | Yes, Page 10 to 16                                         |
| 30. Data and findings consistent       | Was there consistency between the data presented and the findings?                                                              | Yes, there was.<br>Page 10 to 16                           |
| 31. Clarity of major themes            | Were major themes clearly presented in the findings?                                                                            | Yes. they were.<br>From page 9 to 13                       |
| 32. Clarity of minor themes            | Is there a description of diverse cases or discussion of minor themes?                                                          | Discussion of major and minor themes<br>From page 10 to 16 |
